# Supplementary material for: The influence of cis/trans isomerism on the physical properties of a cyano-bridged dinuclear mixed valence complex
Source: Royal Society of Chemistry journal article supplement (doi:10.1039/b110461f), 2002-01-01
Supplement: b110461f-2.doc [file b110461f-2.doc]

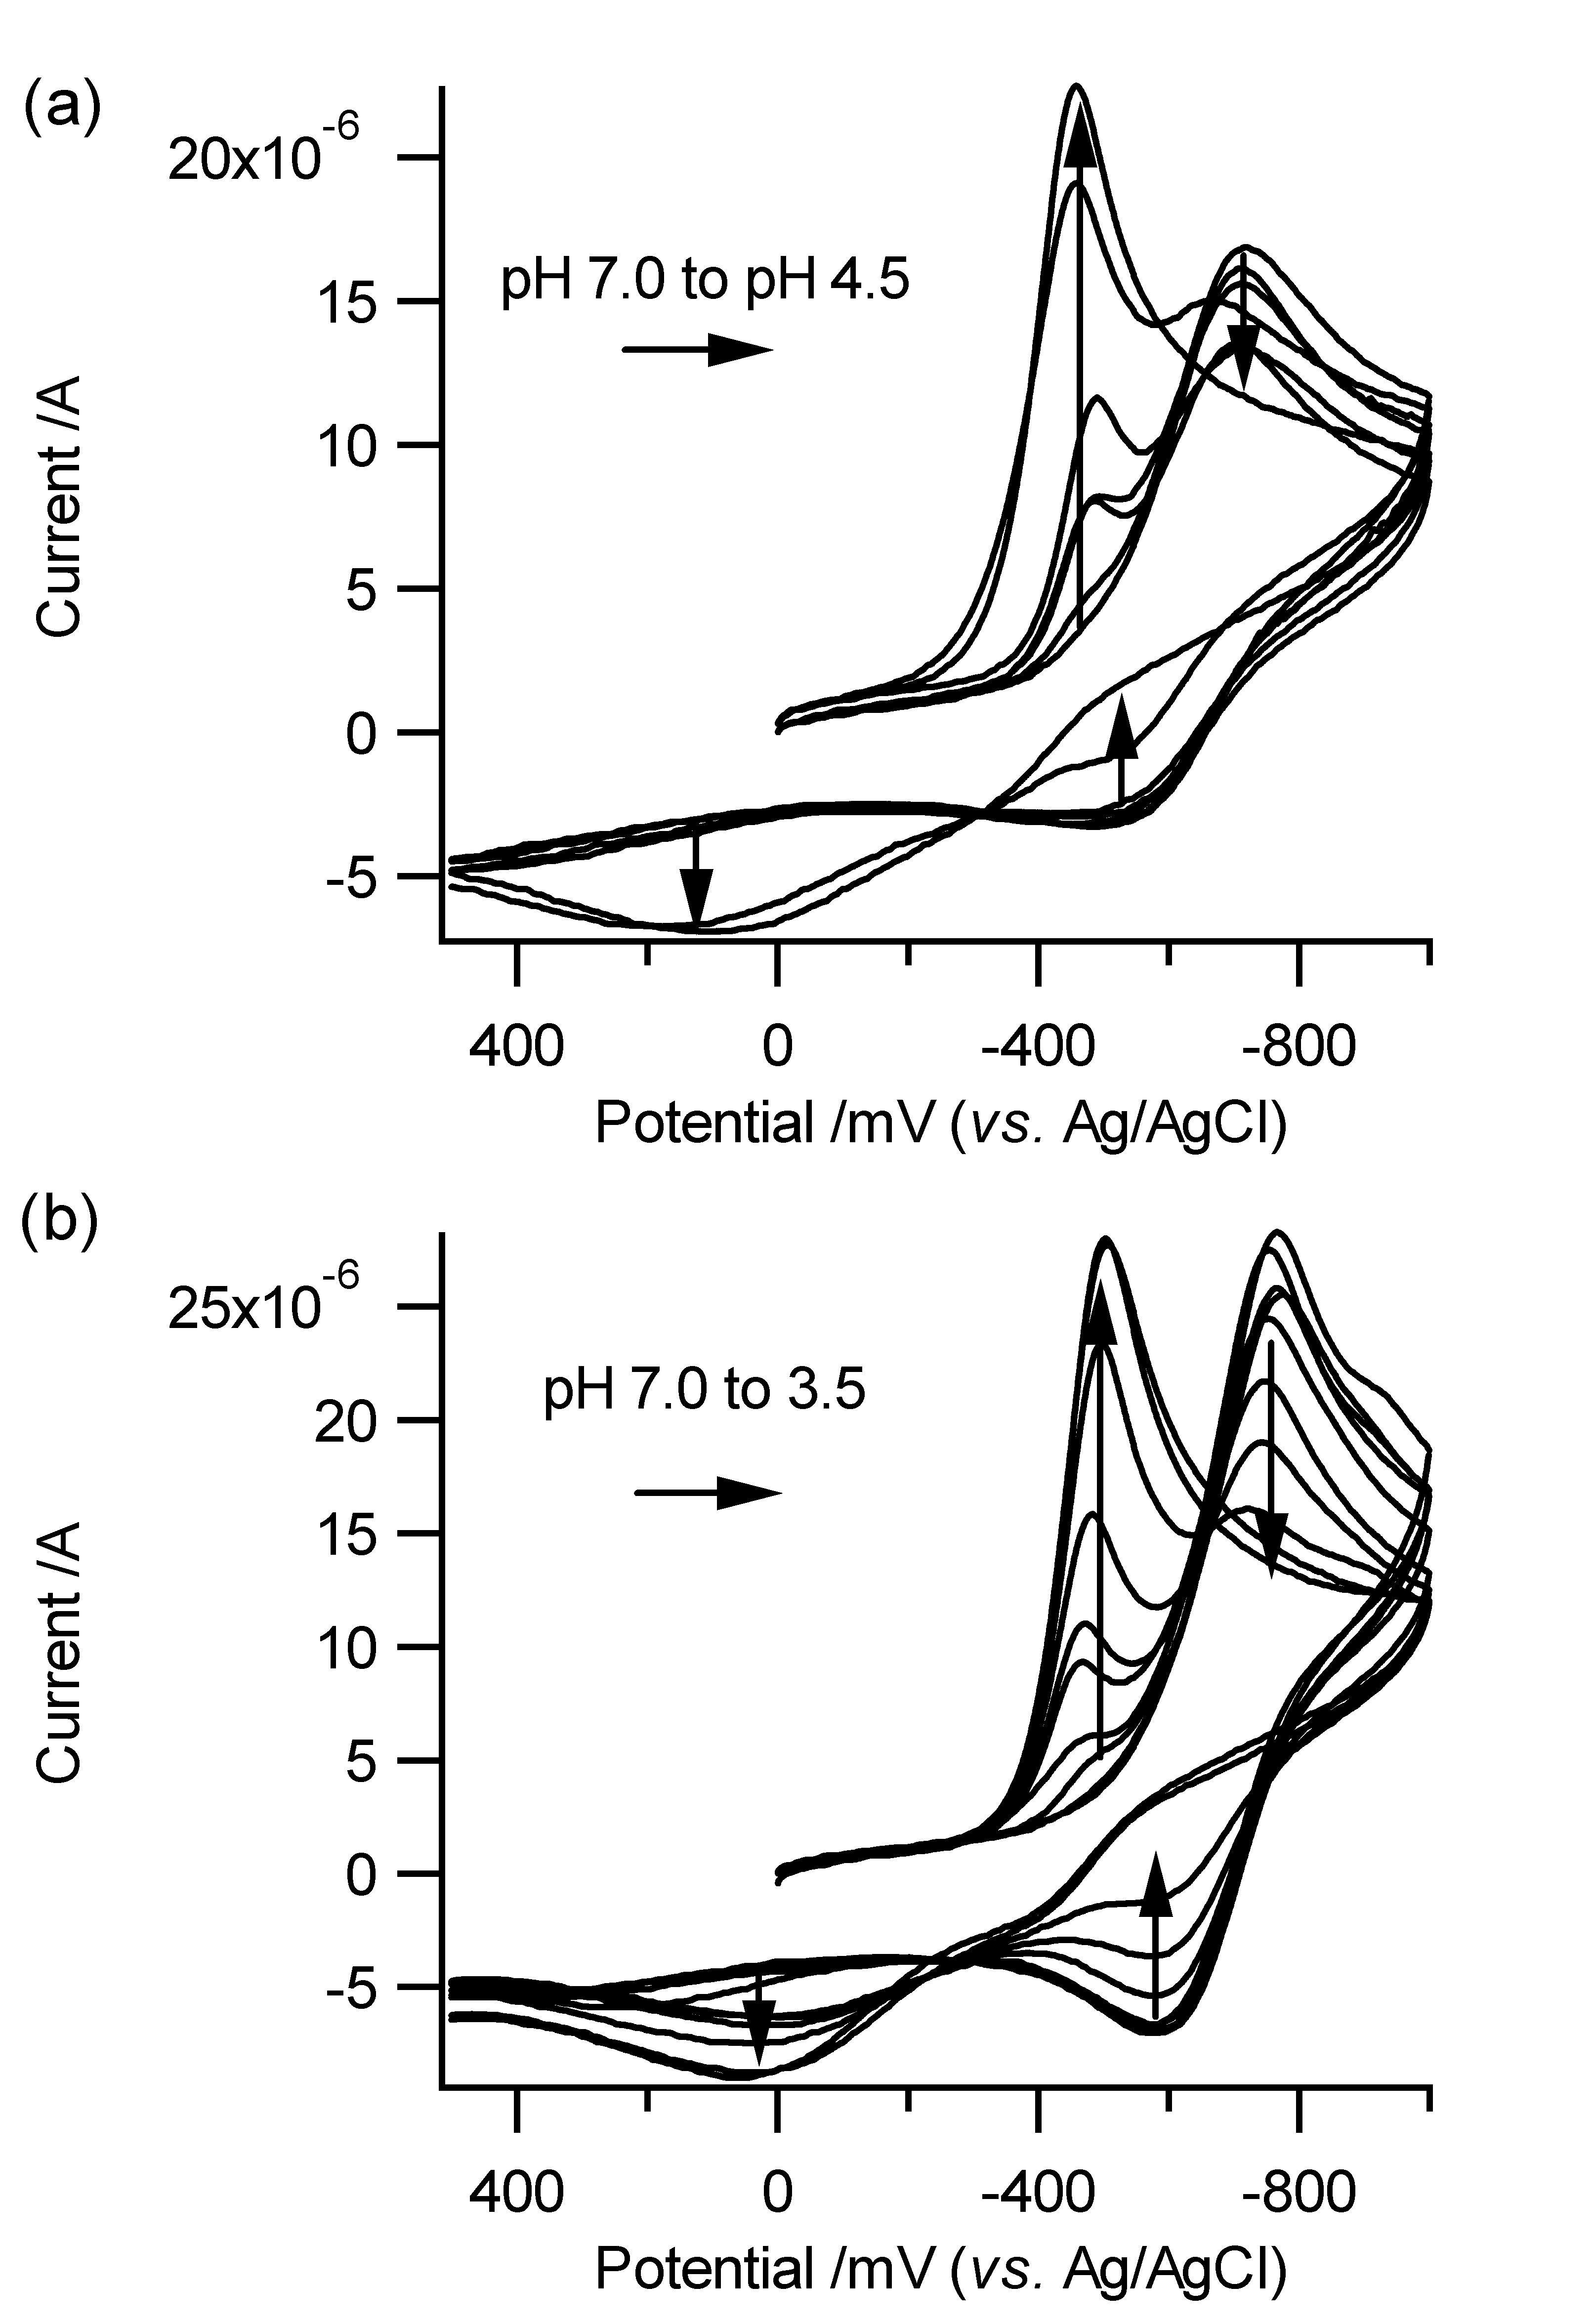


**Figure S2.** Variable pH cyclic voltammograms of (a) *cis*- and (b) *trans-*[CoL14X]n+ (where X = OH-, OH2). Conditions: glassy-carbon working electrode; scan rate 100 mV s-1; *ca*. 2 mmol dm-3 solutions in 0.1 mol dm‑3 NaClO4; 25°C.
