# Supplementary figures and images for: The influence of cis/trans isomerism on the physical properties of a cyano-bridged dinuclear mixed valence complex
Source: Royal Society of Chemistry journal article supplement (doi:10.1039/b110461f), 2002-01-01

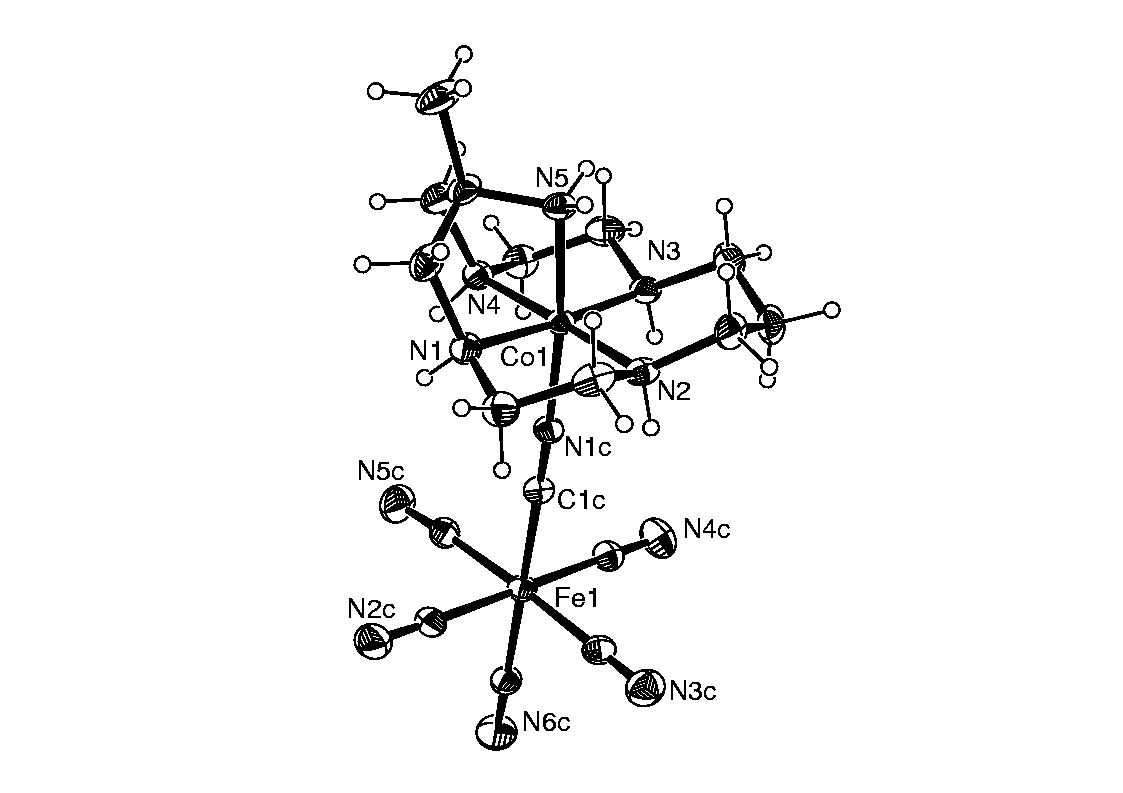


**Figure S1.** View of *trans*-[L14CoIIINCFeIII(CN)5] (30 % probability ellipsoids shown).

Supplement: b110461f-1.doc [file b110461f-1.doc]
